# Supplementary material for: Urinary and serum oxysterols in children: developmental pattern and potential biomarker for pediatric liver disease
Source: PubMed Central journal article supplement (PMC7174363; doi:10.1038/s41598-020-63758-2), 2020-04-21

**Urinary and serum oxysterols in children: developmental pattern and potential biomarker for pediatric liver disease**

Yugo Takaki,<sup>1</sup> Tatsuki Mizuochi,<sup>1,\*</sup> Hajime Takei,<sup>2</sup> Keisuke Eda,<sup>1</sup> Ken-ichiro Konishi,<sup>1</sup> Jun Ishihara,<sup>1</sup> Masahiro Kinoshita,<sup>1</sup> Naoki Hashizume,<sup>3</sup> Yushiro Yamashita,<sup>1</sup> Hiroshi Nittono,<sup>2</sup> and Akihiko Kimura<sup>1</sup>

<sup>1</sup>Department of Pediatrics and Child Health, Kurume University School of Medicine, Kurume, Fukuoka, Japan

<sup>2</sup>Junshin Clinic Bile Acid Institute, Meguro-ku, Tokyo, Japan

<sup>3</sup>Department of Pediatric Surgery, Kurume University School of Medicine, Kurume, Fukuoka, Japan

\* **Corresponding author:** Tatsuki Mizuochi, MD, PhD, Department of Pediatrics and Child Health, Kurume University School of Medicine, 67 Asahi-machi, Kurume, Fukuoka 8300011, Japan.

Tel.: +81-942 317565; fax: +81-942 381792; email: mizuochi\_tatsuki@kurume-u.ac.jp

**Running title:** Urinary and serum oxysterols in children

## Supplementary Methods

### *Chemicals and reagents*

4 $\beta$ -Hydroxycholesterol (cholest-5-en-3 $\beta$ ,4 $\beta$ -diol), 7 $\alpha$ -hydroxycholesterol (cholest-5-en-3 $\beta$ ,7 $\alpha$ -diol), 7-oxo-cholesterol (cholest-5-en-3 $\beta$ -ol-7-one), 20(S)-hydroxycholesterol (cholest-5-en-3 $\beta$ ,20S-diol) 22(R)-hydroxycholesterol (cholest-5-en-3 $\beta$ ,22R-diol) and 25-hydroxycholesterol (cholest-5-en-3 $\beta$ ,25-diol) were purchased from Steraloids (Newport, RI, US). 22(S)-hydroxycholesterol (cholest-5-en-3 $\beta$ ,22S-diol) was purchased from Sigma-Aldrich (St. Louis, MO, US). 24(S)-hydroxycholesterol (cholest-5-en-3 $\beta$ ,24S-diol) was purchased Enzo Life Sciences (East Farmingdale, NY, US). 27-hydroxycholesterol (25(R)-cholest-5-en-3 $\beta$ ,26-diol) was purchased from Research Plus (Farmingdale, NJ, US). d<sub>6</sub>-25-Hydroxycholesterol (26,26,26,27,27,27-[<sup>2</sup>H<sub>6</sub>]25hydroxycholesterol) was purchased from Cayman Chemical (Ann Arbor, MI, US).

Nicotinic acid, N,N-dimethyl-4-aminopyridine (DMAP), N,N-dimethylformamide (DMF), butylated hydroxytoluene (BHT), chloroform, ethanol and hexane were purchased from Kanto Chemical (Tokyo, Japan). 1-(3-Dimethylaminopropyl)-3-ethylcarbodiimide hydrochloride (EDC) was purchased from Tokyo Chemical Industry (Tokyo, Japan). All solvents for chemical reaction and reagents used were analytical reagent grade. All LC/ESI-MS/MS analysis solvents (water, methanol, acetonitrile) were used LC/ESI-MS/MS grade and purchased from Kanto Chemical. The Glufatase kit was purchased from Nippon Bio-Test Laboratories (Wako, Japan). Sulfatase from *Helix pomatia* (Type H-2) was purchased

from Sigma-Aldrich.

#### *Preparation of standard solutions*

Individual stock solutions of oxysterols were prepared separately at 1 mg/mL in methanol and stored at -25°C. These solutions were mixed equally for analysis of unknown samples. Five point-calibration standard solutions (0.1, 0.3, 1.0, 3.0, and 10.0 pmol/mL) for LC/ESI-MS/MS analysis were prepared in acetonitrile. Calibration standard solutions were stable in analytical glass tubes for at least 2 weeks at -25°C.

#### *LC/ESI-MS/MS analysis*

The LC/ESI-MS/MS system included a TSQ Quantum Discovery Max mass spectrometer (Thermo Fisher Scientific, San Jose, CA, US) equipped with an ESI probe and Surveyor HPLC system (Thermo Fisher Scientific). A chromatography separation column, InertSustain C8 HP (150 mm × 2.1 mm ID, 3 μm particle size; GL Sciences, Tokyo, Japan), was maintained at 35°C. A mixture of 10 mM ammonium acetate and acetonitrile was used as the eluent, and separation was carried out by linear gradient elution at a flow rate of 0.25 mL/min. Composition of the mobile phase was gradually changed as follows: ammonium acetate-acetonitrile (18:82, v/v) for 2 min, ammonium acetate-acetonitrile (14:86, v/v) for 2-33 min, ammonium acetate-acetonitrile (2:98, v/v) for 33-34 min, and ammonium acetate-acetonitrile

(2:98, v/v) for 4 min. While operating the LC/ESI-MS/MS apparatus, the spray voltage and vaporizer temperature were set at 3000 V and 330°C, respectively. The sheath and auxiliary gas (nitrogen) pressures were set at 60 and 12 arbitrary units, respectively, while the ion transfer capillary temperature was 330°C. The collision gas (argon) pressure and the collision energy were kept at 1.3 mm Torr and 7-39 eV respectively, all in the positive ion mode.

### Supplementary Figure

Oxysterol analysis between cholestatic liver disease (CLD; n=4) and acute liver failure (ALF; n=3)

#### Urine

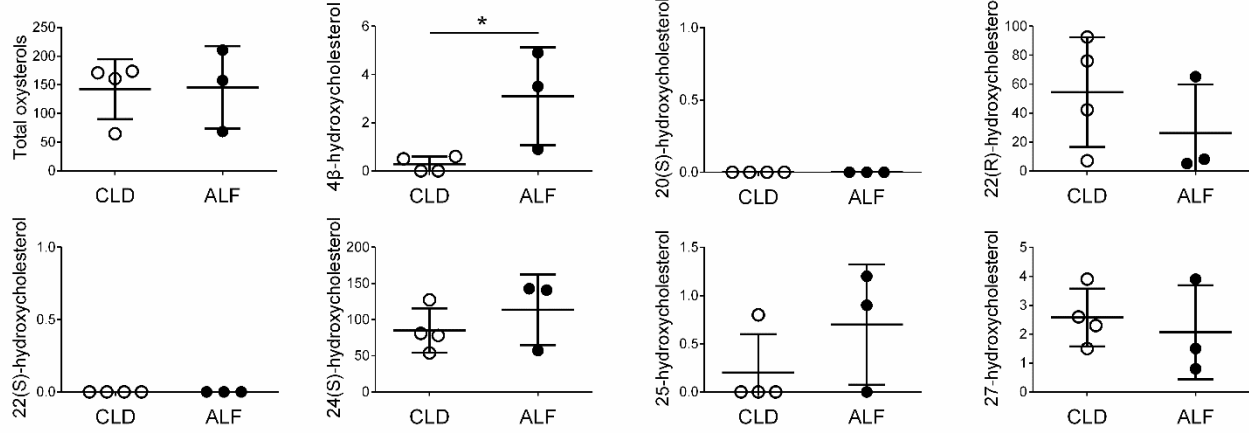

#### Serum

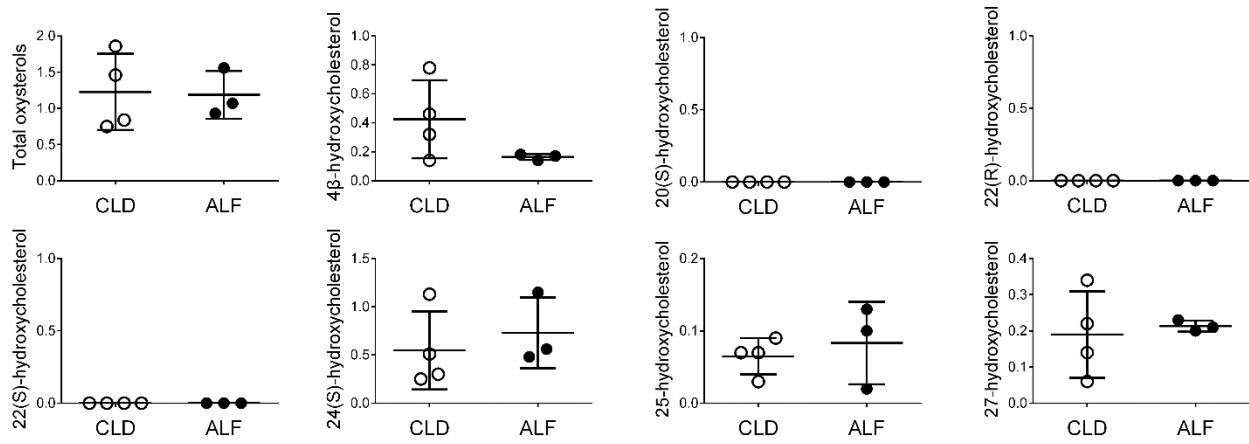

Supplement: 41598_2020_63758_MOESM1_ESM.pdf [file 41598_2020_63758_MOESM1_ESM.pdf]
